# Supplementary material for: Effect of Blood Transfusion on Cerebral Hemodynamics and Vascular Topology Described by Computational Fluid Dynamics in Sickle Cell Disease Patients
Source: MDPI journal article supplement (doi:10.3390/brainsci12101402), 2022-10-18

# Supplementary Figure S1

## Step1: MRI imaging

Children ages 5-15 years with SCD

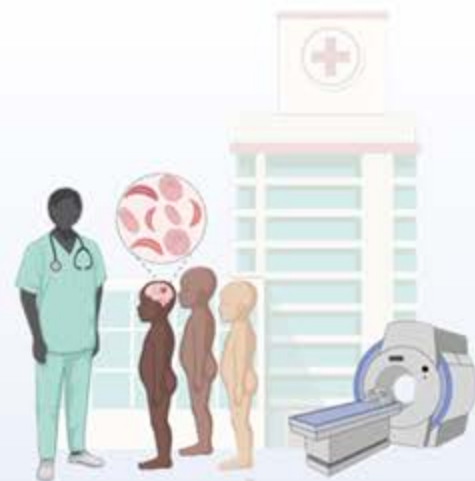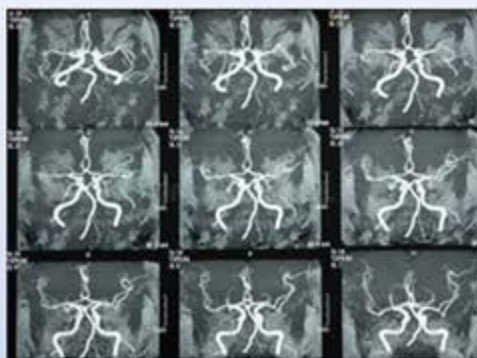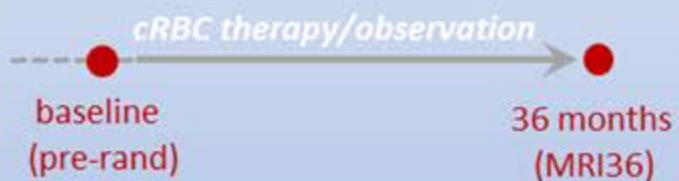

## Step2: Image processing

Feature extract

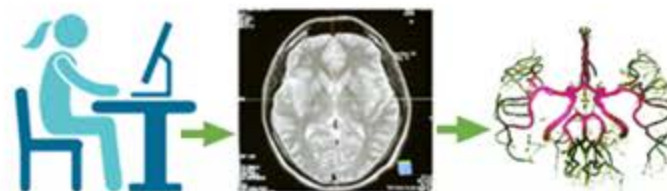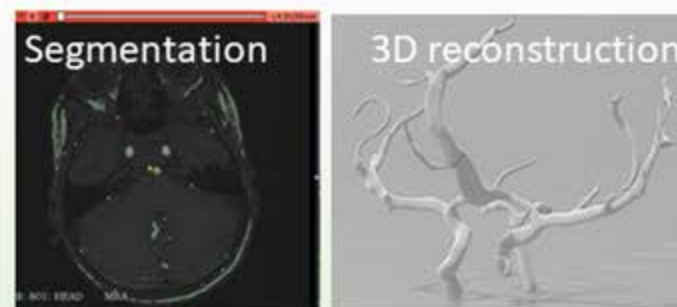

Isolation of left and right MCA

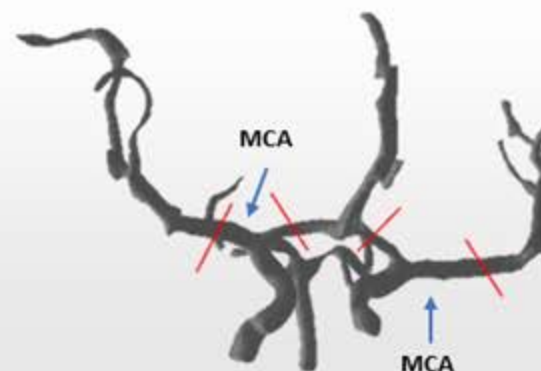

## Step3: CFD and Data analysis

Feature selection

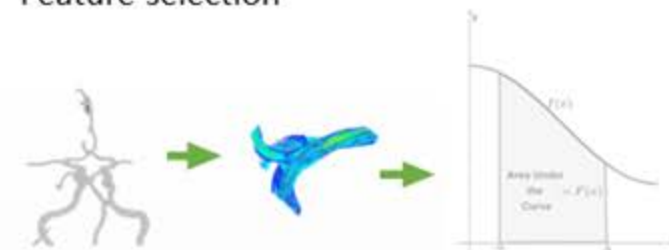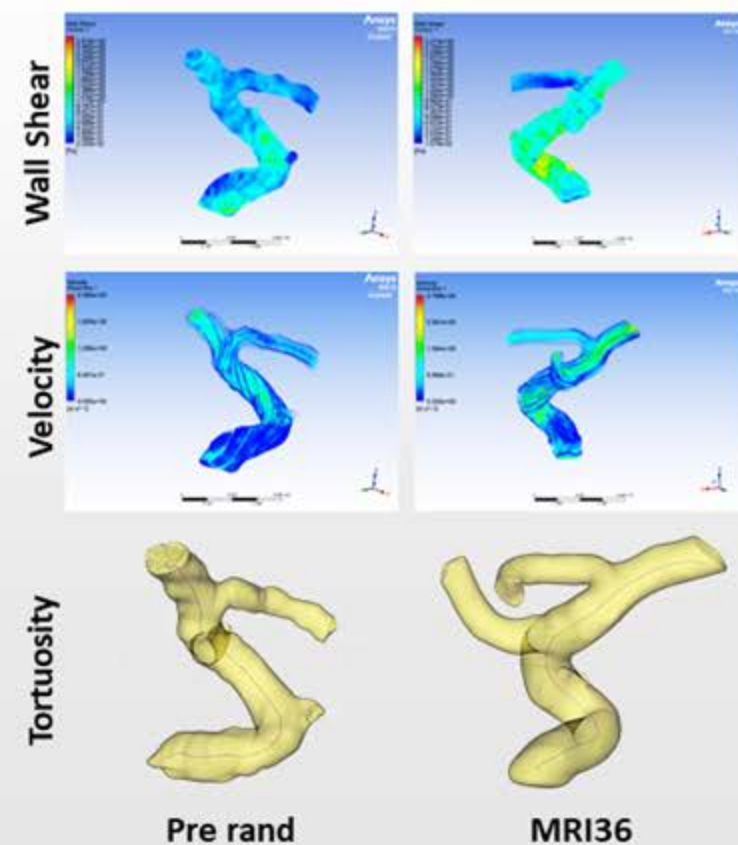

Supplement: s1 [file s1]
