# Supplementary material for: Effect of Blood Transfusion on Cerebral Hemodynamics and Vascular Topology Described by Computational Fluid Dynamics in Sickle Cell Disease Patients
Source: MDPI journal article supplement (doi:10.3390/brainsci12101402), 2022-10-18
Supplement: s1 [file s1]

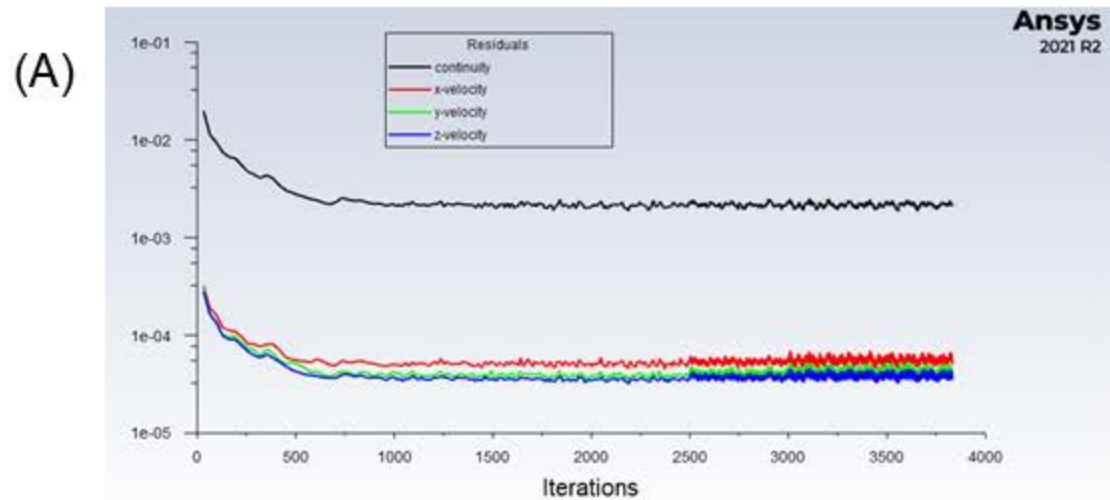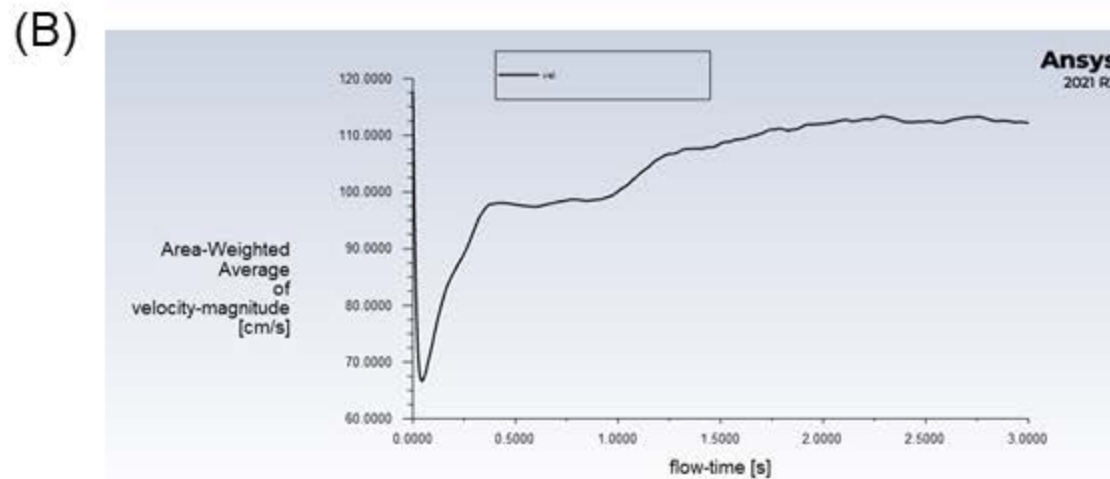

(C)

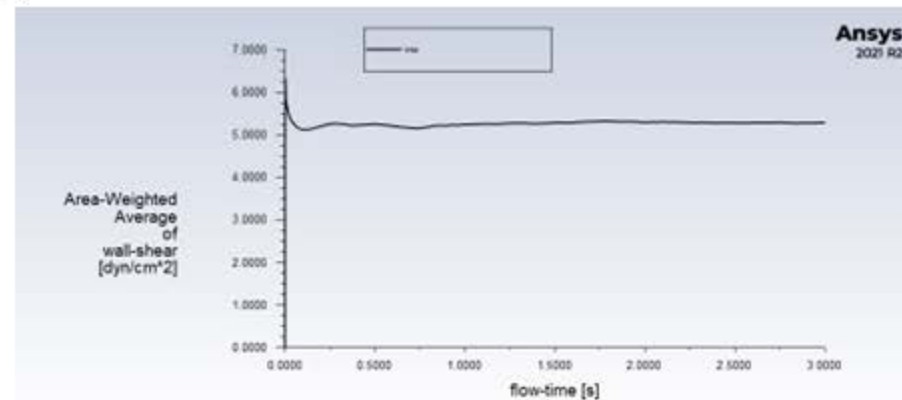

**Supplementary figure S2.** Simulation convergence result. (A) Residual plot., (B) Velocity vs flow time., (C) Wall shear vs flow time.
