# Supplementary material for: Effect of Blood Transfusion on Cerebral Hemodynamics and Vascular Topology Described by Computational Fluid Dynamics in Sickle Cell Disease Patients
Source: MDPI journal article supplement (doi:10.3390/brainsci12101402), 2022-10-18
Supplement: s1 [file s1]

**Supplementary Table S1.** Mesh convergence study showing percentage variation in velocity and wall shear with respect to baseline value (9500 elements). **(A)** Percent error of Velocity (measured in MCA outlet) with respect to change in number of elements. **(B)** Percent error of Wall shear (measured vessel wall) with respect to change in number of elements.

(A)

| Total Number of Mesh elements | Absolute Percentage Variation of velocity |
|-------------------------------|-------------------------------------------|
| 6500                          | 0.35                                      |
| 10000                         | 0.52                                      |
| 12000                         | 3.15                                      |
| 15500                         | 4.02                                      |
| 18000                         | 4.89                                      |

(B)

| Total Number of Mesh elements | Absolute Percentage Variation of Wall Stress |
|-------------------------------|----------------------------------------------|
| 6500                          | 3.70                                         |
| 10000                         | 1.85                                         |
| 12000                         | 0.74                                         |
| 15500                         | 7.40                                         |
| 18000                         | 9.07                                         |
